# Supplementary material
Source: PubMed Central journal article supplement (PMC4259185)
Supplement: Supp_Figure1.pdf [file Supp_Figure1.pdf]

## Supplementary Data

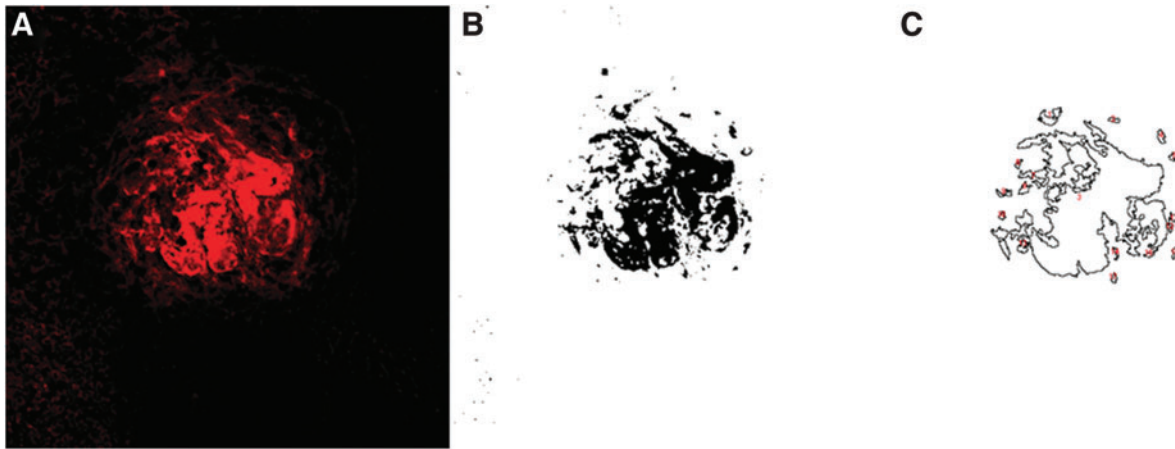

**SUPPLEMENTARY FIG. S1.** Example of choroidal neovascularization (CNV) area measurement using ImageJ. **(A)** Confocal images of stained laser-induced CNV. **(B)** Binary image of CNV. **(C)** Using the particle analysis method of ImageJ, the areas were automatically measured.
